# Supplementary material for: Systemic delivery of miR-126 by miRNA-loaded Bubble liposomes for the treatment of hindlimb ischemia
Source: PubMed Central journal article supplement — Sci Rep. 2014 Jan 24;4:3883. doi: 10.1038/srep03883 (PMC3900923; doi:10.1038/srep03883), 2014-01-24

**Systemic delivery of miR-126 by miRNA-loaded Bubble liposomes for the  
treatment of hindlimb ischemia**

*Yoko Endo-Takahashi<sup>a</sup>, Yoichi Negishi<sup>a\*</sup>, Arisa Nakamura<sup>a</sup>, Saori Ukai<sup>a</sup>, Kotomi Ooku<sup>a</sup>, Yusuke Oda<sup>b</sup>, Katsutoshi Sugimoto<sup>c</sup>, Fuminori Moriyasu<sup>c</sup>, Norio Takagi<sup>d</sup>, Ryo Suzuki<sup>b</sup>, Kazuo Maruyama<sup>b</sup>,  
Yukihiko Aramaki<sup>a</sup>*

<sup>a</sup>Department of Drug Delivery and Molecular Biopharmaceutics, School of Pharmacy, Tokyo University of Pharmacy and Life Sciences, 1432-1 Horinouchi, Hachioji, Tokyo 192-0392, Japan

<sup>b</sup>Laboratory of Drug and Gene Delivery Research, Faculty of Pharma-Sciences, Teikyo University, 2-11-1 Kaga, Itabashi-ku, Tokyo 173-8605, Japan

<sup>c</sup>Department of Gastroenterology and Hepatology, Tokyo Medical University, 6-7-1 Nishishinjuku, Shinjuku-ku, Tokyo 160-0023, Japan

<sup>d</sup>Department of Applied Biochemistry, School of Pharmacy, Tokyo University of Pharmacy and Life Sciences, 1432-1 Horinouchi, Hachioji, Tokyo 192-0392, Japan

Corresponding author: Yoichi Negishi

Tel. & Fax: +81-42-676-3183

E-mail: [negishi@toyaku.ac.jp](mailto:negishi@toyaku.ac.jp)

**Supplementary Figure S1.**

Full scans of the blots shown in Figure 1b.

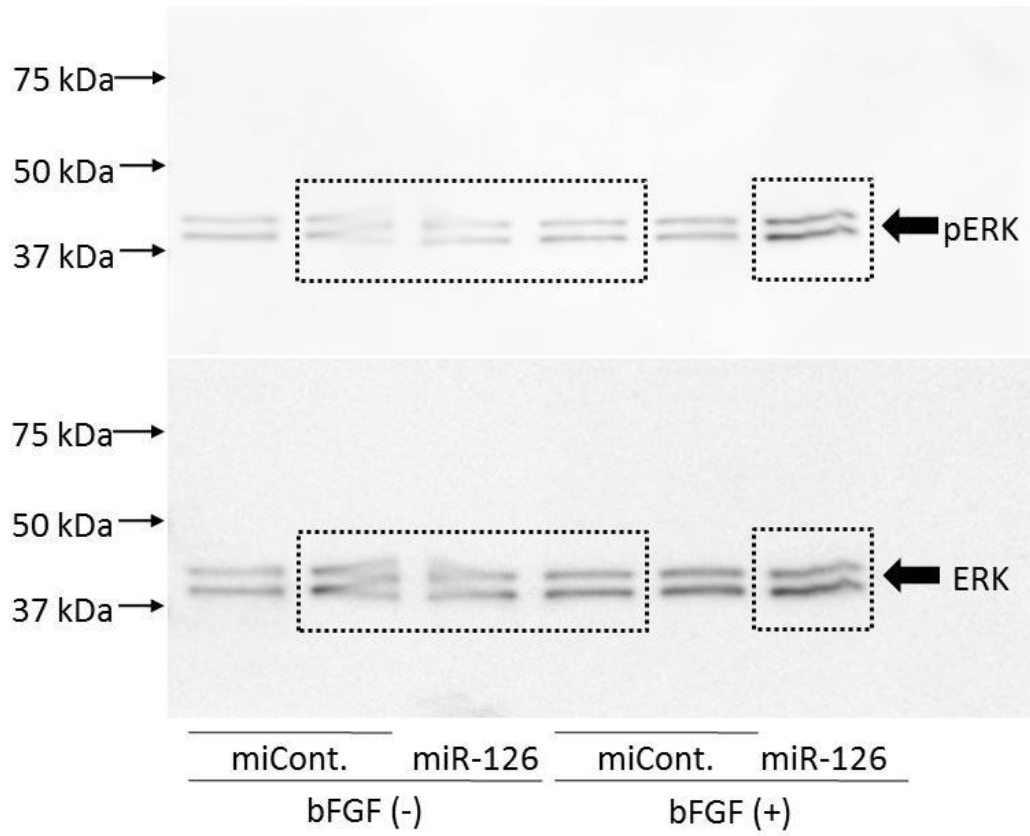

Supplement: srep03883-s1.pdf [file srep03883-s1.pdf]
